# Supplementary material for: Estimating the Seroincidence of Scrub Typhus using Antibody Dynamics after Infection
Source: PubMed Central journal article supplement (PMC11310618; doi:10.4269/ajtmh.23-0475), 2024-06-11

## SUPPLEMENTAL MATERIAL

### Estimating the seroincidence of scrub typhus using antibody dynamics following infection

**Authors:** Kristen Aiemjoy, Nishan Katuwal, Krista Vaidya, Sony Shrestha, Melina Thapa, Peter Teunis, Isaac I. Bogoch, Paul Trowbridge, Stuart D. Blacksell, Daniel Paris, Tri Wangrangsamakul, George M Varghese, Richard Maude, Dipesh Tamrakar, Jason R. Andrews

#### Corresponding Author:

Kristen Aiemjoy

Assistant Professor

Division of Epidemiology

Department of Public Health Sciences,

University of California Davis School of Medicine, Davis, CA, USA

Department of Microbiology and Immunology, Faculty of Tropical Medicine, Mahidol University, Bangkok Thailand

[kaiemjoy@ucdavis.edu](mailto:kaiemjoy@ucdavis.edu)

### SUPPLEMENTAL FIGURE 1: SAMPLING COLLECTION OVER TIME AND GEOGRAPHIC UNIT

Each point indicates an individual who was sampled at a given time (X-axis) and their quantitative anti-OT56kda IgG antibody response (Y-axis). The color of the dot represents the participant's age in years.

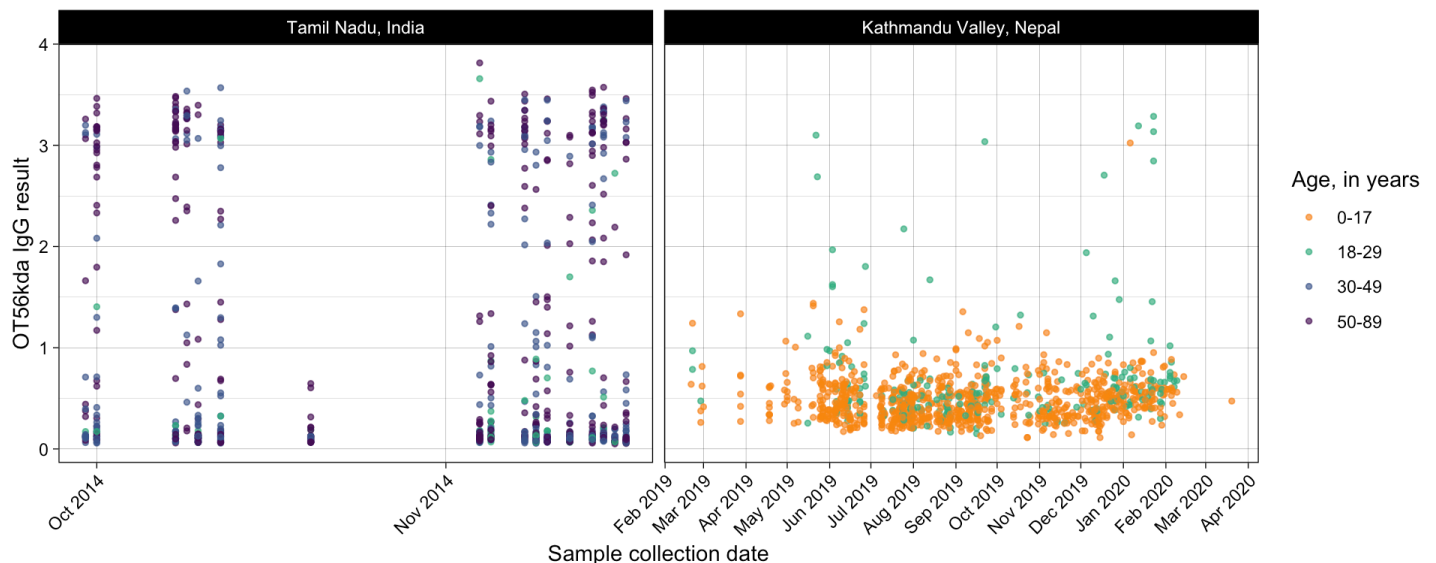

**SUPPLEMENTAL TABLE 1: DATA SOURCES**

| Study                        | Data Source                                                                                                                                                                                                                                                                                                                              |
|------------------------------|------------------------------------------------------------------------------------------------------------------------------------------------------------------------------------------------------------------------------------------------------------------------------------------------------------------------------------------|
| Nepal population data        | <p><b>Study design described here:</b> Aiemjoy et al., 2022. Estimating typhoid incidence from community-based serosurveys: a multicohort study. <i>The Lancet Microbe</i> 3: e578–e587</p> <p><b>*Scrub typhus serology reported in this paper for the first time</b></p>                                                               |
| Thailand pediatric case data | <p><b>Study design described here:</b> Wangrangsimakul et al., 2020. Clinical Characteristics and Outcome of Children Hospitalized With Scrub Typhus in an Area of Endemicity. <i>Journal of the Pediatric Infectious Diseases Society</i> 9: 202–209</p> <p><b>*Longitudinal seroresponse data reported for the first time here</b></p> |
| Thailand adult case data     | <p><b>Data previously published here:</b> Blacksell et al., 2015. Diagnostic Accuracy of the InBios Scrub Typhus Detect Enzyme-Linked Immunoassay for the Detection of IgM Antibodies in Northern Thailand. <i>Clin Vaccine Immunol</i> 23: 148–154</p>                                                                                  |
| India longitudinal data      | <p><b>Data previously published here:</b> Varghese et al., 2018. Kinetics of IgM and IgG antibodies after scrub typhus infection and the clinical implications. <i>International Journal of Infectious Diseases</i> 71: 53–55</p>                                                                                                        |
| India population data        | <p><b>Data previously published here:</b> Trowbridge et al., 2017. Prevalence and risk factors for scrub typhus in South India. <i>Tropical Medicine &amp; International Health</i> 22: 576–582</p>                                                                                                                                      |

**SUPPLEMENTAL TABLE 2: PRIOR DISTRIBUTIONS FOR MODEL PARAMETERS BY IMMUNOGLOBULIN TYPE (IGM AND IGG)**

Hyperprior and Prior Specifications for Bayesian Model

| Parameter    | Hyperprior Mean | Hyperprior Precision | Prior Variance |
|--------------|-----------------|----------------------|----------------|
| <b>IgM</b>   |                 |                      |                |
| log(y0)      | -2              | 5.0                  | 10             |
| log(y1)      | 1               | 0.5                  | 10             |
| log(t1)      | 1               | 5.0                  | 10             |
| log(alpha)   | -1              | 1.0                  | 50             |
| log(shape)-1 | -3              | 0.5                  | 10             |
| <b>IgG</b>   |                 |                      |                |
| log(y0)      | -2              | 5.0                  | 10             |
| log(y1)      | 1               | 0.5                  | 10             |
| log(t1)      | 1               | 5.0                  | 10             |
| log(alpha)   | -1              | 1.0                  | 50             |
| log(shape)-1 | -3              | 0.5                  | 10             |

**SUPPLEMENTAL TABLE 3: MODELED ANTIBODY KINETIC PARAMETERS**

| Parameter             | Median (IQR)       |                   |
|-----------------------|--------------------|-------------------|
|                       | IgG                | IgM               |
| Decay rate (per year) | 0.11 (0.04-0.29)   | 1.89 (0.87-4.26)  |
| Decay shape           | 1.30 (1.14-1.59)   | 2.19 (1.80-2.73)  |
| Time to peak (days)   | 11.99 (6.62-22.05) | 6.50 (3.66-11.70) |
| Baseline response     | 0.13 (0.07-0.23)   | 0.06 (0.03-0.10)  |
| Peak response         | 2.81 (2.08-3.72)   | 4.87 (3.41-6.90)  |

## SUPPLEMENTAL FIGURE 2: SCRUB TYPHUS SEROINCIDENCE RATES BY GENDER AND STUDY SITE

Points indicate the seroincidence rate for *Orientia Tstusugamushi* per 100,000 person years by sex, age strata and study site. The lines indicate the 95% confidence intervals. Seroincidence was estimated using quantitative ant-OT56kda IgG antibody responses among representative population-based serosurveys in Tamil Nadu, India and the Kathmandu Valley, Nepal.

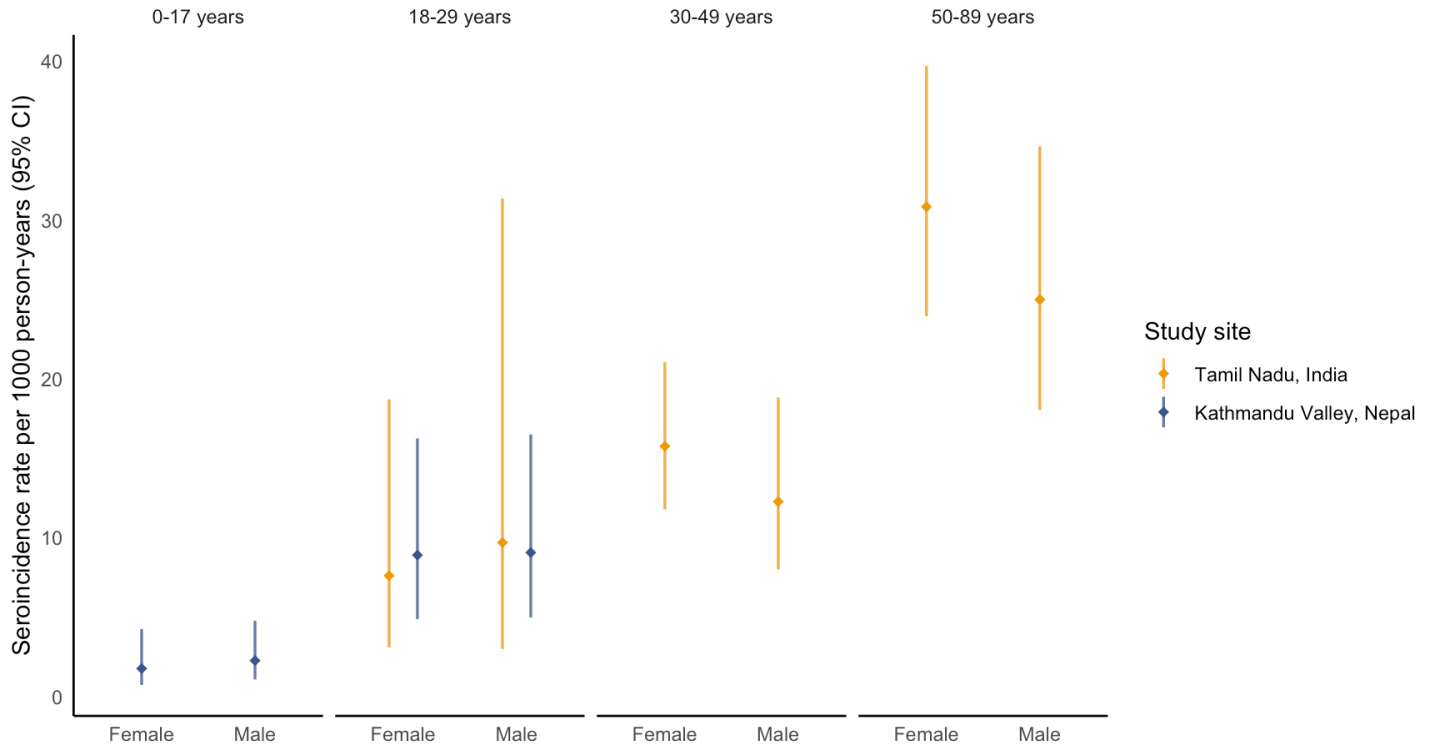

### SUPPLEMENTAL FIGURE 3: COMPARISON OF LONGITUDINAL ANTIBODY KINETIC PARAMETERS BETWEEN STUDY COUNTRIES

Distribution of modeled OT56kda IgG and IgM antibody decay kinetics comparing confirmed scrub typhus cases enrolled from Chiang Rai, Thailand, and Tamil Nadu, India.

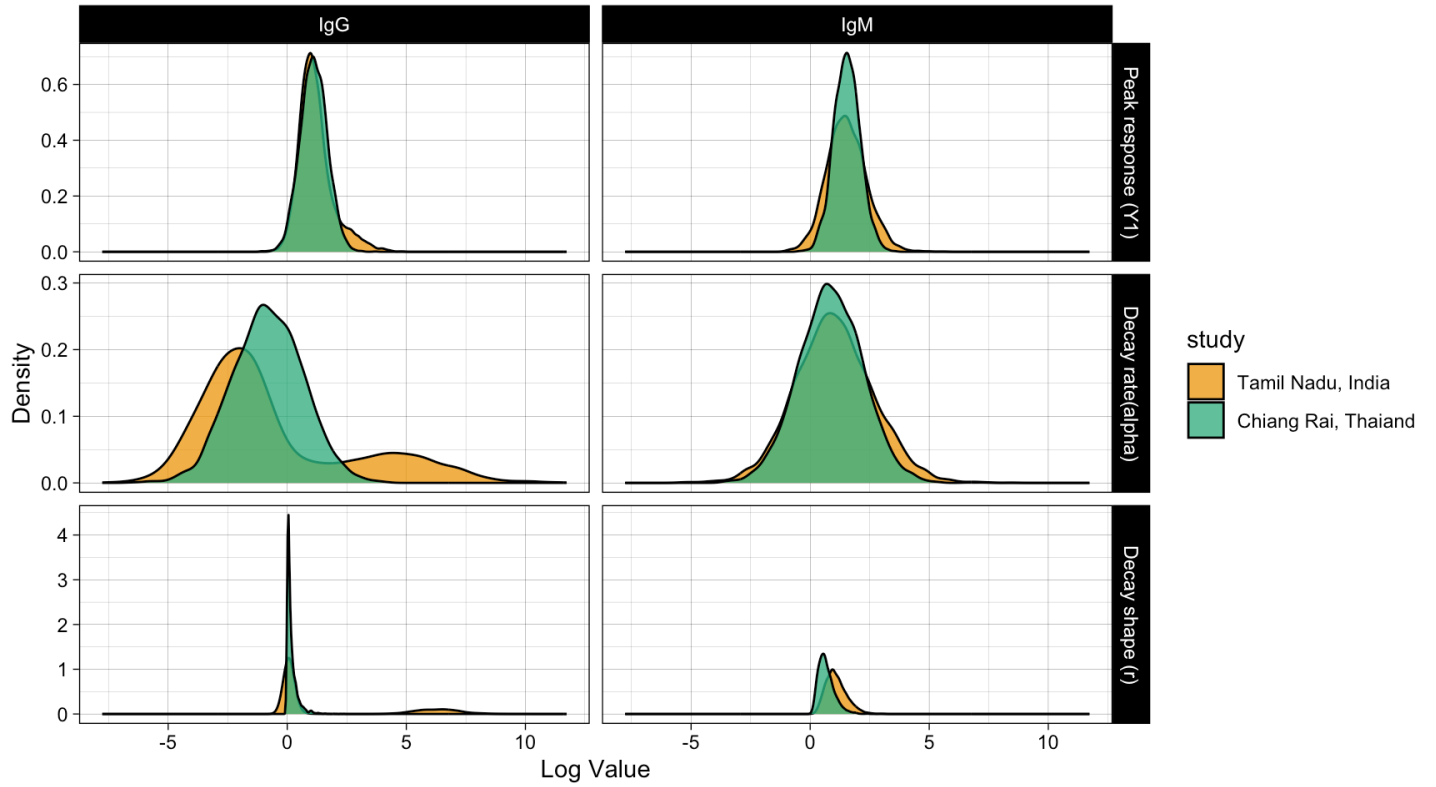

### SUPPLEMENTAL FIGURE 4: ORIENTIA TSUTSUGAMUSHI SEROINCIDENCE RATES FOR THE TAMIL NADU POPULATION SEROSURVEY COMPARING TWO LONGITUDINAL ANTIBODY KINETICS MODELS

Points indicate the *Orientia Tsutsugamushi* seroincidence rate per 100,000 person-years, and the lines indicate the 95% confidence intervals. Seroincidence was estimated using quantitative ant-OT56kda IgG antibody responses among representative population-based serosurveys and antibody kinetics modeled from confirmed scrub typhus cases. The solid lines use antibody kinetics modeled from confirmed cases in Tamil Nadu, India alone, and the dashed lines used antibody kinetics from Tamil Nadu, India, and Chiang Rai, Thailand.

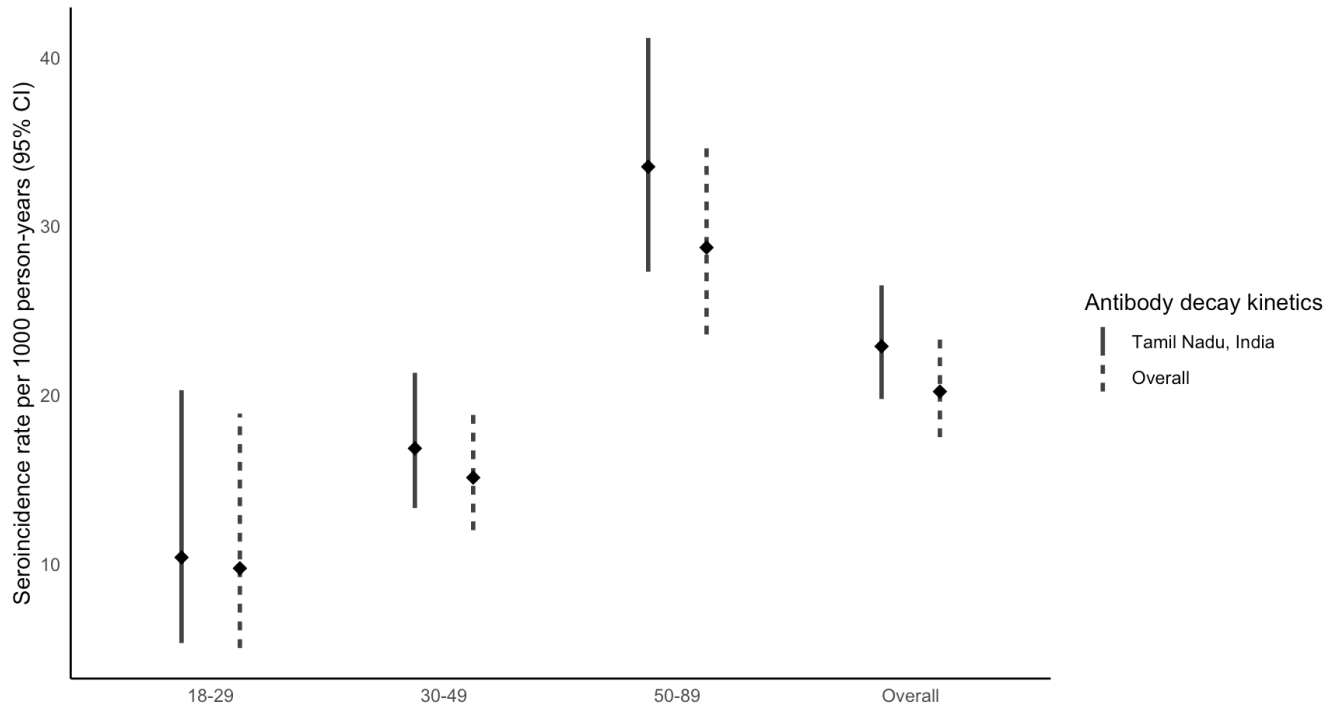

**SUPPLEMENTAL FIGURE 5: RESIDUALS FROM BAYESIAN HIERARCHICAL MODEL OF ANTIBODY KINETICS**

Residual plots for the fit of the modeled antibody kinetics to the observed longitudinal antibody responses. The y-axis indicates the log residual difference between the observed data and the fitted decay model.

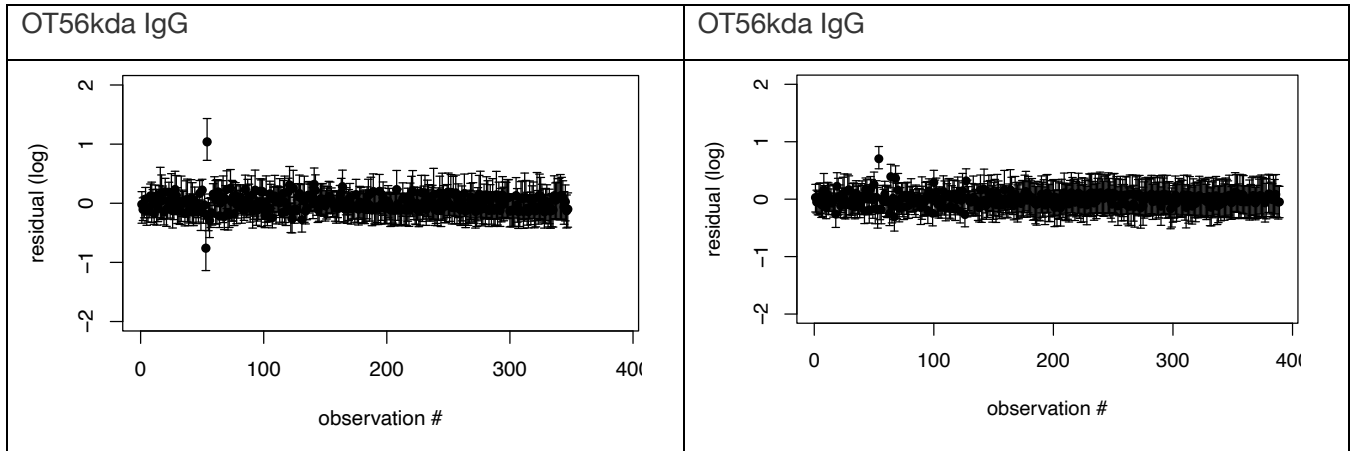

Supplement: tpmd230475.SD1.pdf [file tpmd230475.SD1.pdf]
